# Supplementary material
Source: publisher site journal article supplement (https://zoologia.pensoft.net/article/19864/download/suppl/34/)

#### Appendix S4: Protocol for testing error in digitalization

The result of the protocol that tests error in digitalization, evaluating the tangent space in relation to Procrustes distance was a slope of 0.999487, correlation (begin) of 1.0, and root MS error of 0.000024.

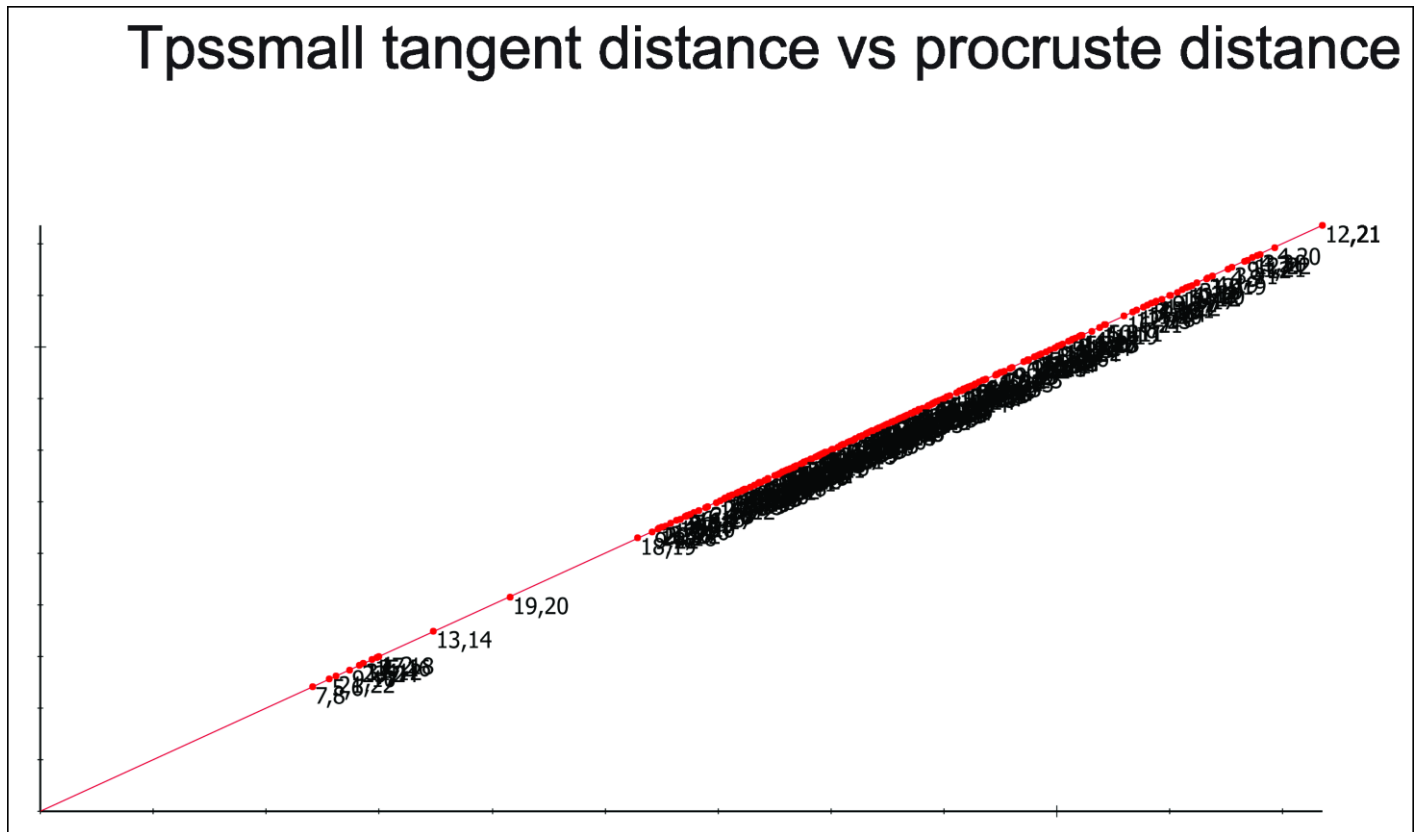

Supplement: Supplementary file 1
